# Supplementary material for: Landscape of transcription in human cells
Source: Springer Nature journal article supplement (doi:10.1038/nature11233), 2012-09-01
Supplement: 41586_2012_BFnature11233_MOESM269_ESM.pdf [file 41586_2012_BFnature11233_MOESM269_ESM.pdf]

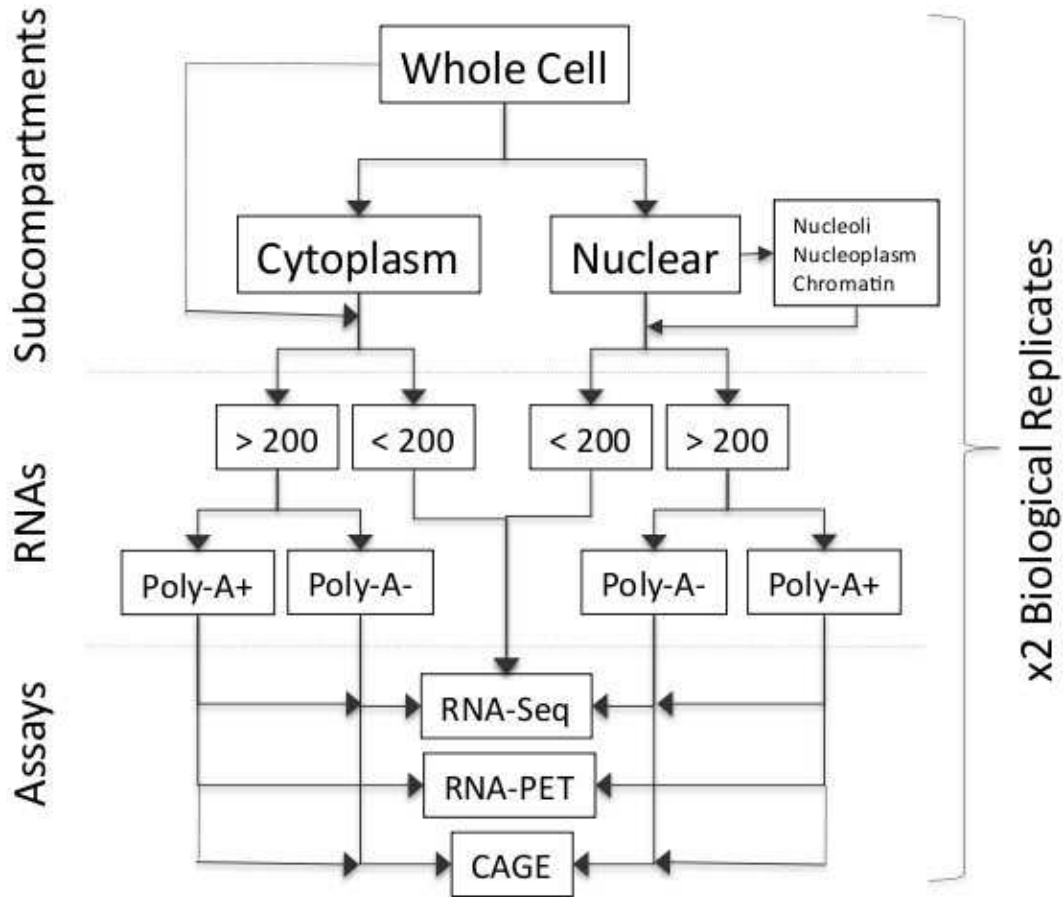

**Supplementary Figure S1**

**Sample Flowchart.** The ENCODE transcriptome data are obtained from several cell lines which have been cultured in replicates. They were either left intact (whole cell) and/or fractionated into cytoplasm and nucleus prior to RNA isolation. Total RNA was then isolated and partitioned into RNA  $\geq$  200bp (long) and  $<$  200bp (short). The long RNA was further partitioned over an oligo-dT column into polyA+ and polyA- fractions. The K562 cell line also underwent additional fractionation into nucleoli, nucleoplasm and chromatin, but no further partition into polyA+ and polyA- was done. RNA-seq was conducted on polyA+, polyA- and total (K562) RNA samples. CAGE was conducted primarily on polyA+ and total RNA but also on some polyA- samples. RNA-PET was conducted on PolyA+ samples only (not shown here are RNA-seq experiments performed at CalTech on polyA+ whole cell RNA extracts).

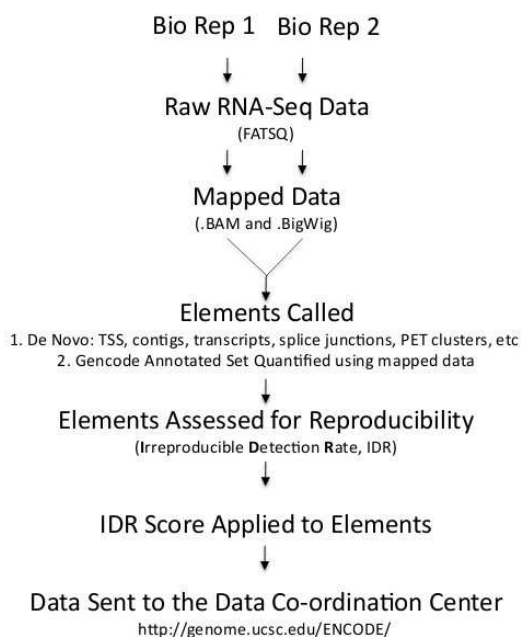

### Supplementary Figure S2

**Data Processing.** This figure shows an overview of the transcriptome data processing pipeline. Raw read data (FASTQs) from each biological replicate is independently mapped against the hg19 ENCODE sex-specific assemblies according to the gender of the sample to generate .BAM (alignment) and .wig (signal) files. Each data type is processed through a custom pipeline developed by the production lab and subsequently distilled into elements, like splice junctions, contigs, de novo assembled genes and transcripts, CAGE and PET clusters. Though this is usually done by pooling biological replicates each element is independently quantified per replicate to allow for a statistical assessment of reproducibility. The mapped data is also used to quantify Gencode annotated features, such as genes, transcripts and exons. All elements and features are assessed for their reproducibility using *npIDR* or *IDR* (see section II). Finally, all data is sent to the Data Co-ordination Centre (DCC) at UCSC.

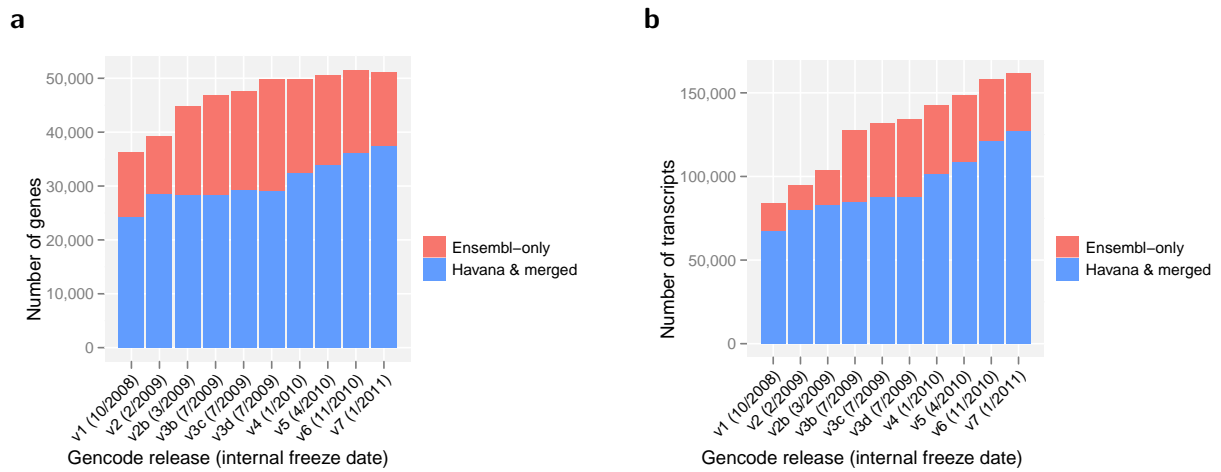

### Supplementary Figure S3

**Gencode annotation growth over time.** This figure shows the number of Gencode (a) genes and (b) transcripts over time. Ensembl-only: found by the Ensembl pipeline only; Havana & merged: found by Havana manual annotation or confirmed by both Havana and Ensembl.

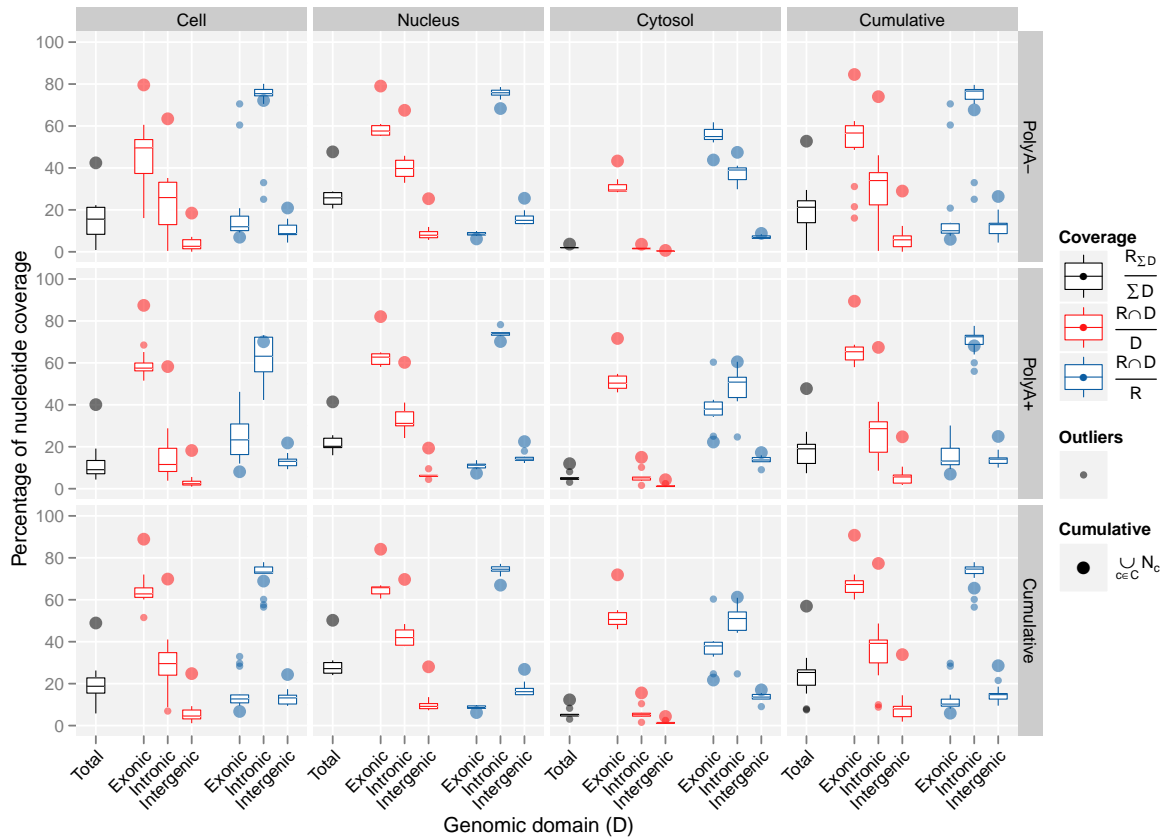

### Supplementary Figure S4

**Nucleotide coverage and relative expression of Gencode exonic, intronic and intergenic regions.** Using RNA-seq data (RNA-seq contigs with  $npIDR \leq 0.1$ ), we estimated the relative coverage of the whole genome (unstranded, excluding gaps) (black), the relative coverage of the 3 main genomic domains (exons, introns, intergenic regions) (red), and the distribution of RNA-seq nucleotides (nt) in the 3 main genomic domains (blue). The box plots are generated from values across all cell lines, illustrating the variation across cell lines. The largest point shows the cumulative value, the smaller points depict outliers.  $D$ : set of nt of a given genomic domain;  $R$ : set of nt in one or several RNA-seq experiments;  $\Sigma D$ : set of nt in the genome.

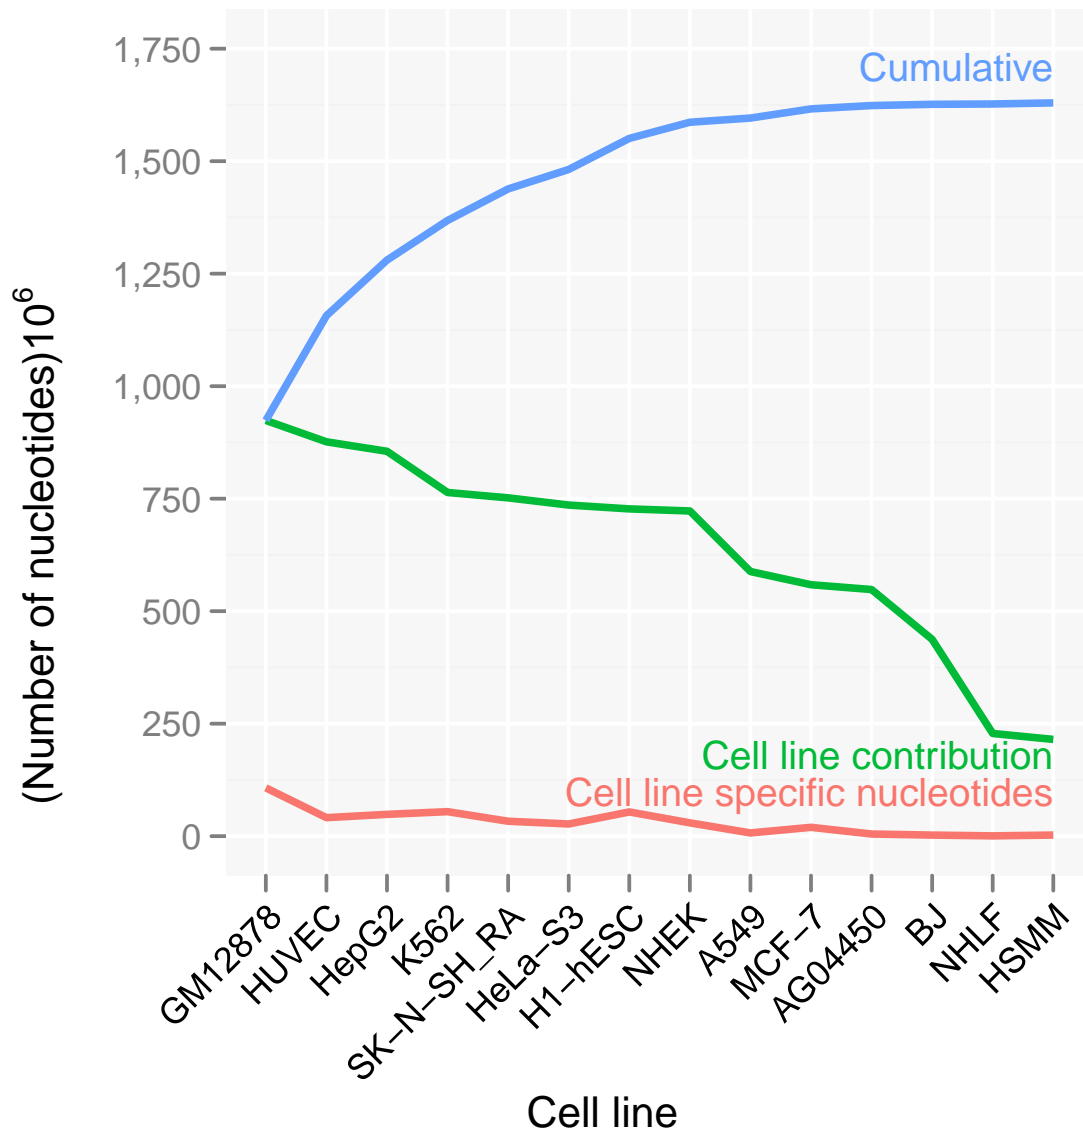

### Supplementary Figure S5

**Cell line contribution to the detected transcripts.** All CSHL and Caltech PE long RNA-seq experiments with 2 bio-replicates are considered, representing a total of 14 cell lines. Cell lines are ordered by number of nucleotides contributed, i.e. by number of distinct unstranded nucleotides present in the *npIDR*'ed contigs of this cell line (cell line contribution). Nucleotides present in a given cell line but not in the 13 others are considered specific to this cell line (cell line specific nucleotides). The cumulative number of nucleotide of a given cell line is the number of distinct unstranded nucleotides present in the set of cell lines seen until this point (cumulative total).

**a**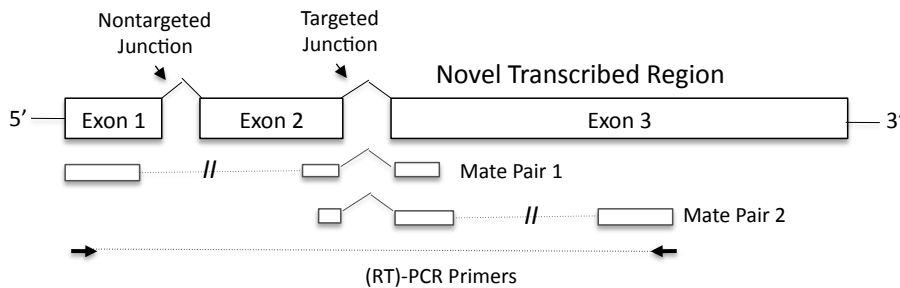**b**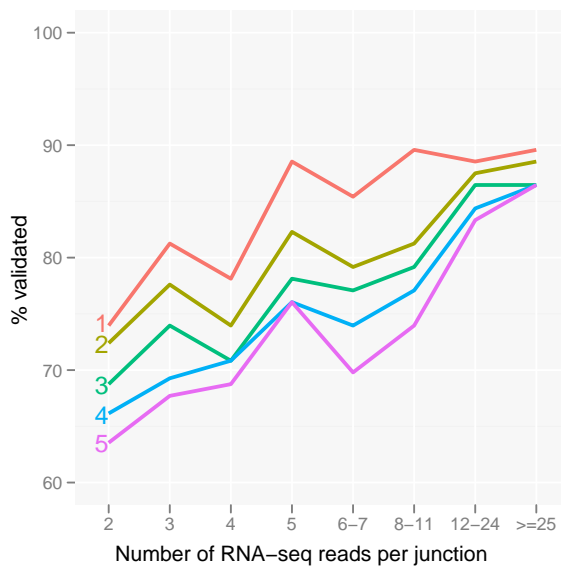**Supplementary Figure S6**

**RT-PCR Validation of Novel Splice Junctions.** (a) A set of 3,000 GT/AG splice junctions identified from the Illumina RNA-seq data that are not annotated in Gencode and which map to intergenic and antisense regions of H1-hESC, HepG2 and Hela-S3 were selected for further validation using targeted RT-PCR. The unspliced reads from 2 mate pairs which share a common targeted junction were used to guide primer selection. These primers were used to separately amplify cDNA from the relevant cell line. The products were run on an agarose gel (data not shown) and pooled for sequencing on the Roche FLX 454. (b) The percentage of candidate junctions validated by Roche 454 sequencing as a function of the number of supporting RNA-seq reads, for the H1-hESC validation experiment. Different lines (1-5) correspond to the minimum number of Roche 454 reads per junction required for validation.

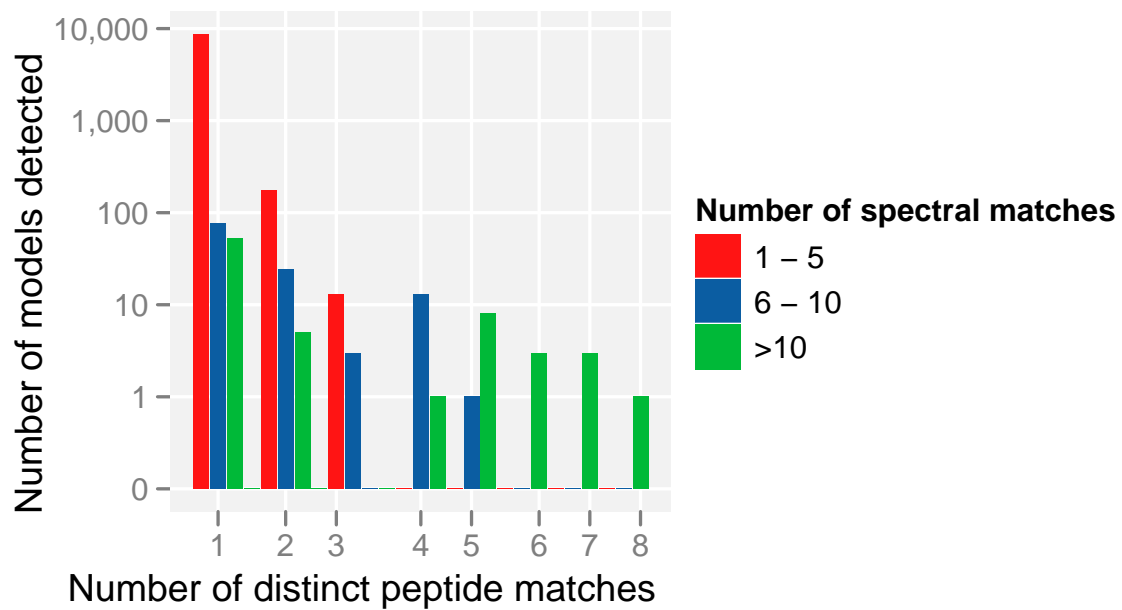

### Supplementary Figure S7

**Distribution of spectral and peptide identifications in novel exons.** The height of each bar represents the number of model sequences for which there were peptide matches in novel exons. Red, blue, and green bars show that these model sequences were identified from 5 or fewer, 10 or fewer, or more than 10 spectra, respectively. The numbers at the bottom of each bar show how many distinct peptides were identified for these models.

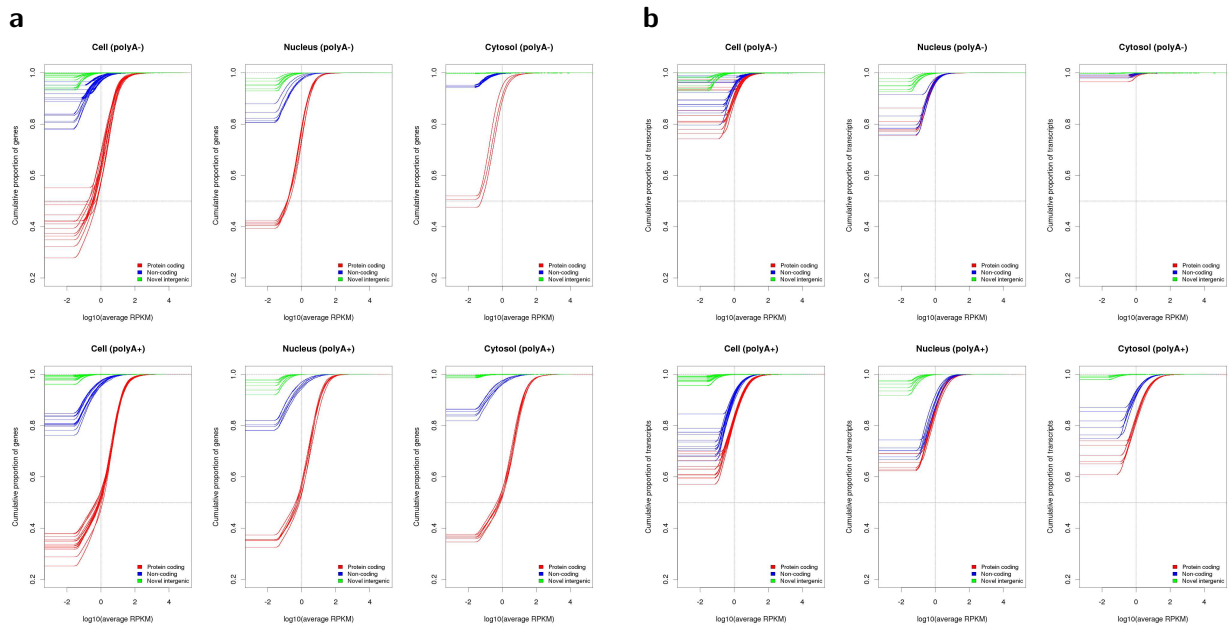

### Supplementary Figure S8

**Cumulative expression of a. genes and b. transcripts.** Shown is the Empirical Cumulative Distribution Function (ECDF) of gene and transcript expression for all genes and transcripts of a particular cell line within a given RNA fraction and compartment. To include non-expressed genes and transcripts in the graph, we adjusted those elements with expression levels of 0 RPKM to an artificial value of  $10^{-6}$  RPKM, so that the onset of each graph represents the fraction of non-expressed genes and transcripts. Only features with  $npIDR \leq 0.1$  are shown.



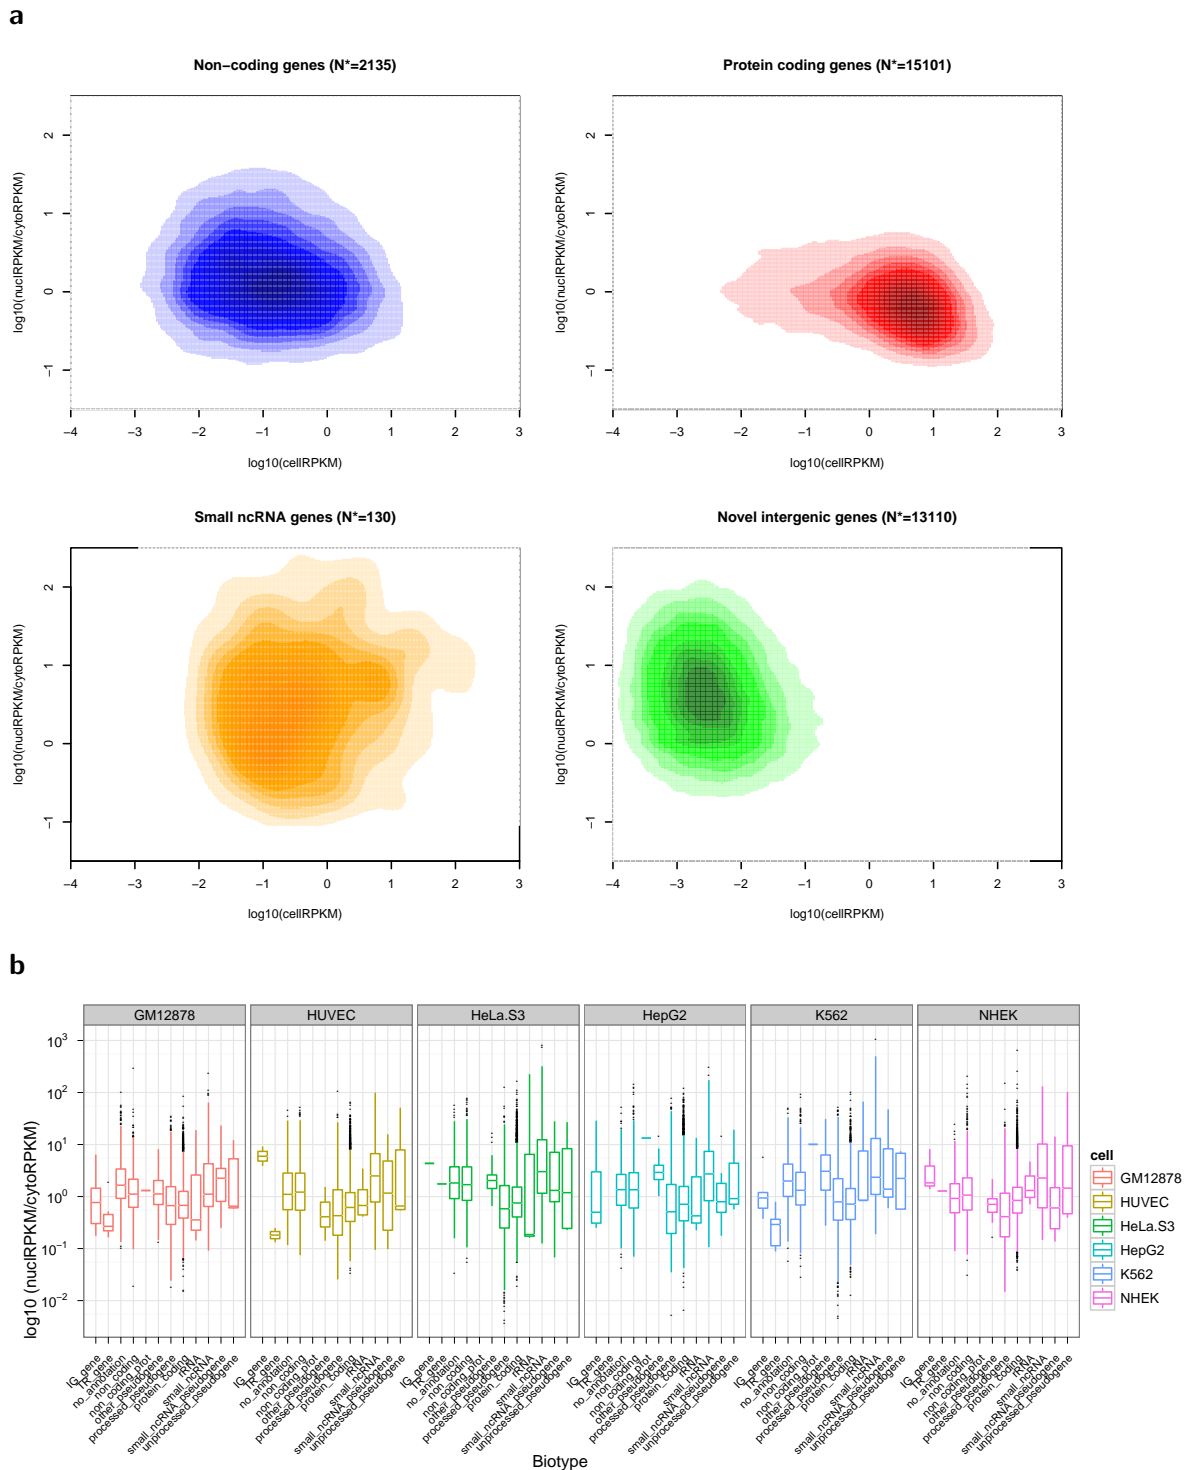

### Supplementary Figure S9

**Abundance of genes types in cellular compartments.** a. Shown are 2D Kernel density plots for (1) long non-coding, (2) protein coding, (3) small non-coding and (4) novel intergenic / antisense (cufflinks) genes, representing the nuclear/cytosolic enrichment of those genes vs their abundance in the whole cell extract. Only those genes present in all three RNA extracts are displayed. The actual values of the estimated Kernel density are indicated by the color shades. ( $N^*$  = average number of genes per cell line, 7 cell lines total). Not filtered by  $npIDR$ . b. The box plots represent the nuclear/cytosolic abundance of various gene biotypes in different cell lines. The larger the ratio, the more nuclear enriched a biotype is ( $npIDR \leq 0.1$ ).

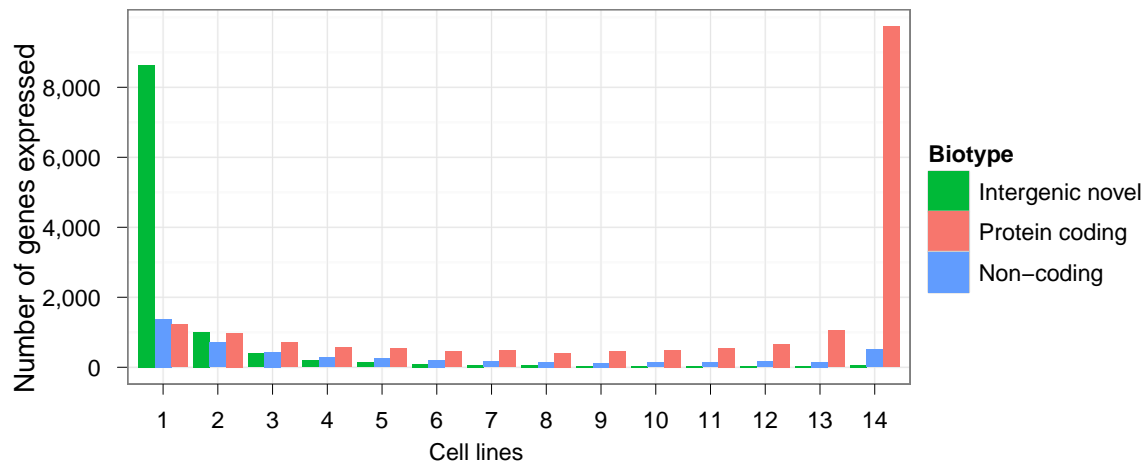

### Supplementary Figure S10

**Cell line specific genes.** Number of genes detected in multiple cell lines. Only protein-coding, non-coding and novel intergenic/antisense genes with  $npIDR \leq 0.1$  were counted as expressed.

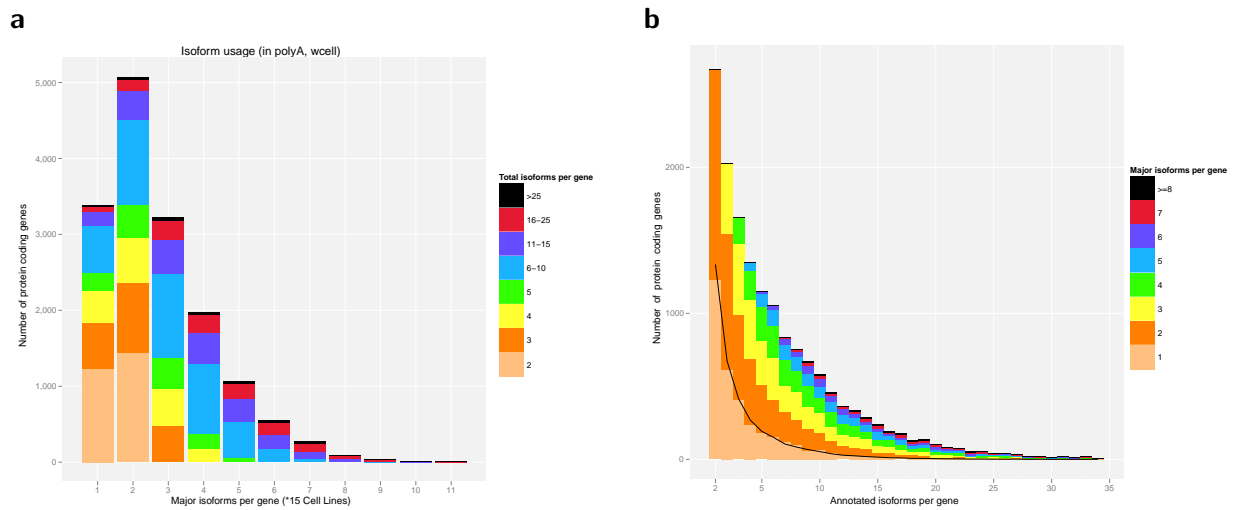

### Supplementary Figure S11

**Usage of major isoform across all cell lines.** Here we have calculated how often a transcript appeared as the isoform with the highest relative expression (= major isoform) per gene across all cell lines. a. Number of protein-coding genes that use one, two, etc, major isoforms across all cell lines. Within each bar, the different colors correspond to the different number of annotated isoforms. b. Number of protein-coding genes that use two, three, etc, isoforms across all cell lines. Within each bar, the different colors represent the number of major isoforms per gene. The black line is the function  $1/n$ , where  $n$  is the number of annotated isoforms.

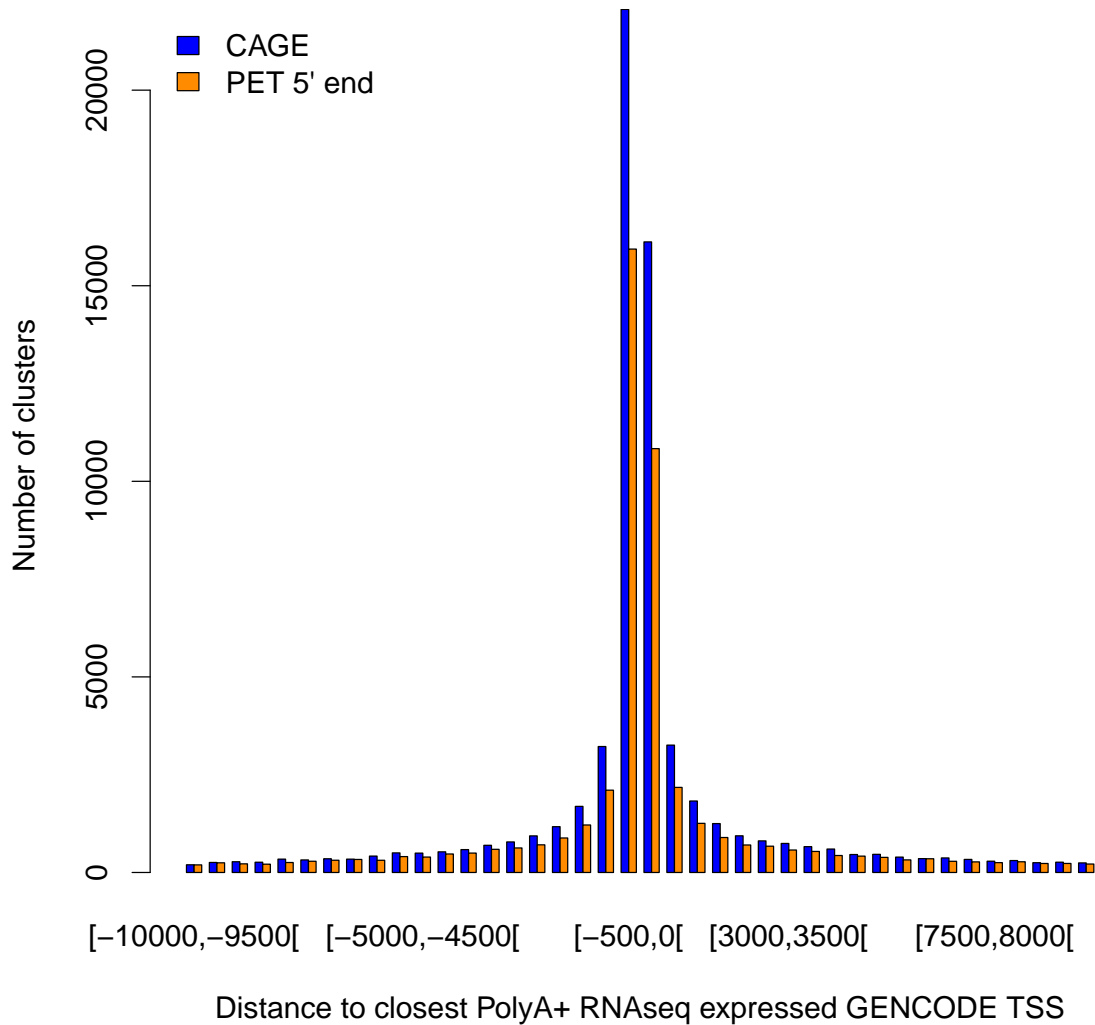

### Supplementary Figure S12

#### Distance between CAGE and PET TSS to the closest RNA-seq expressed Gencode TSS.

The 82,783 CAGE and the 63,864 PET 5' end clusters / TSS obtained from all CAGE and PET experiments were compared to the 97,778 polyA+ RNA-seq expressed Gencode TSS. Plotted here is for each such CAGE and PET TSS the distance to the closest expressed Gencode Transcription Start Site (TSS).

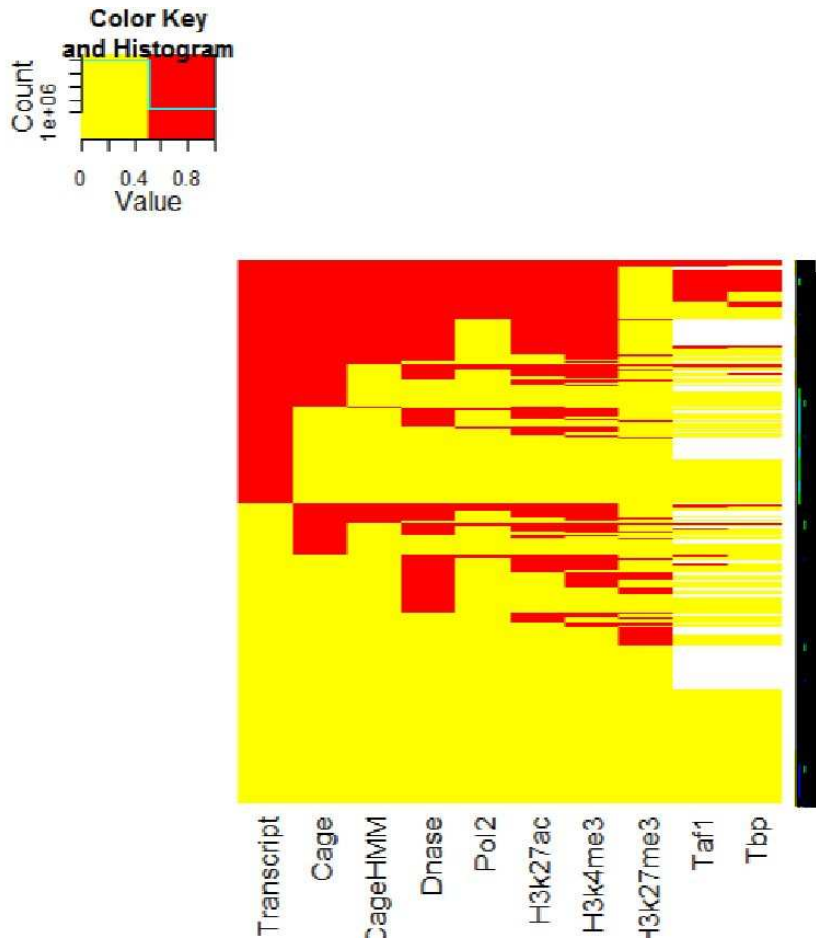

### Supplementary Figure S13

**Transcription Start Sites (TSS).** Heatmap showing the presence (red) or absence (yellow) of various features at putative transcription start sites (5' ends of RNA-seq transcript models expressed in at least one cell line). Each line represents one putative TSS in one cell line. The 'Transcript' column indicates if an RNA-seq transcript model from this TSS is expressed in this sample. 'Cage' shows the presence of a Cage cluster, 'CageHMM' a Cage cluster filtered by the HMM TSS filter. The other columns show DNase Hypersensitivity sites and ChIP-seq peaks for various histone modifications and DNA binding proteins associated with promoter regions.

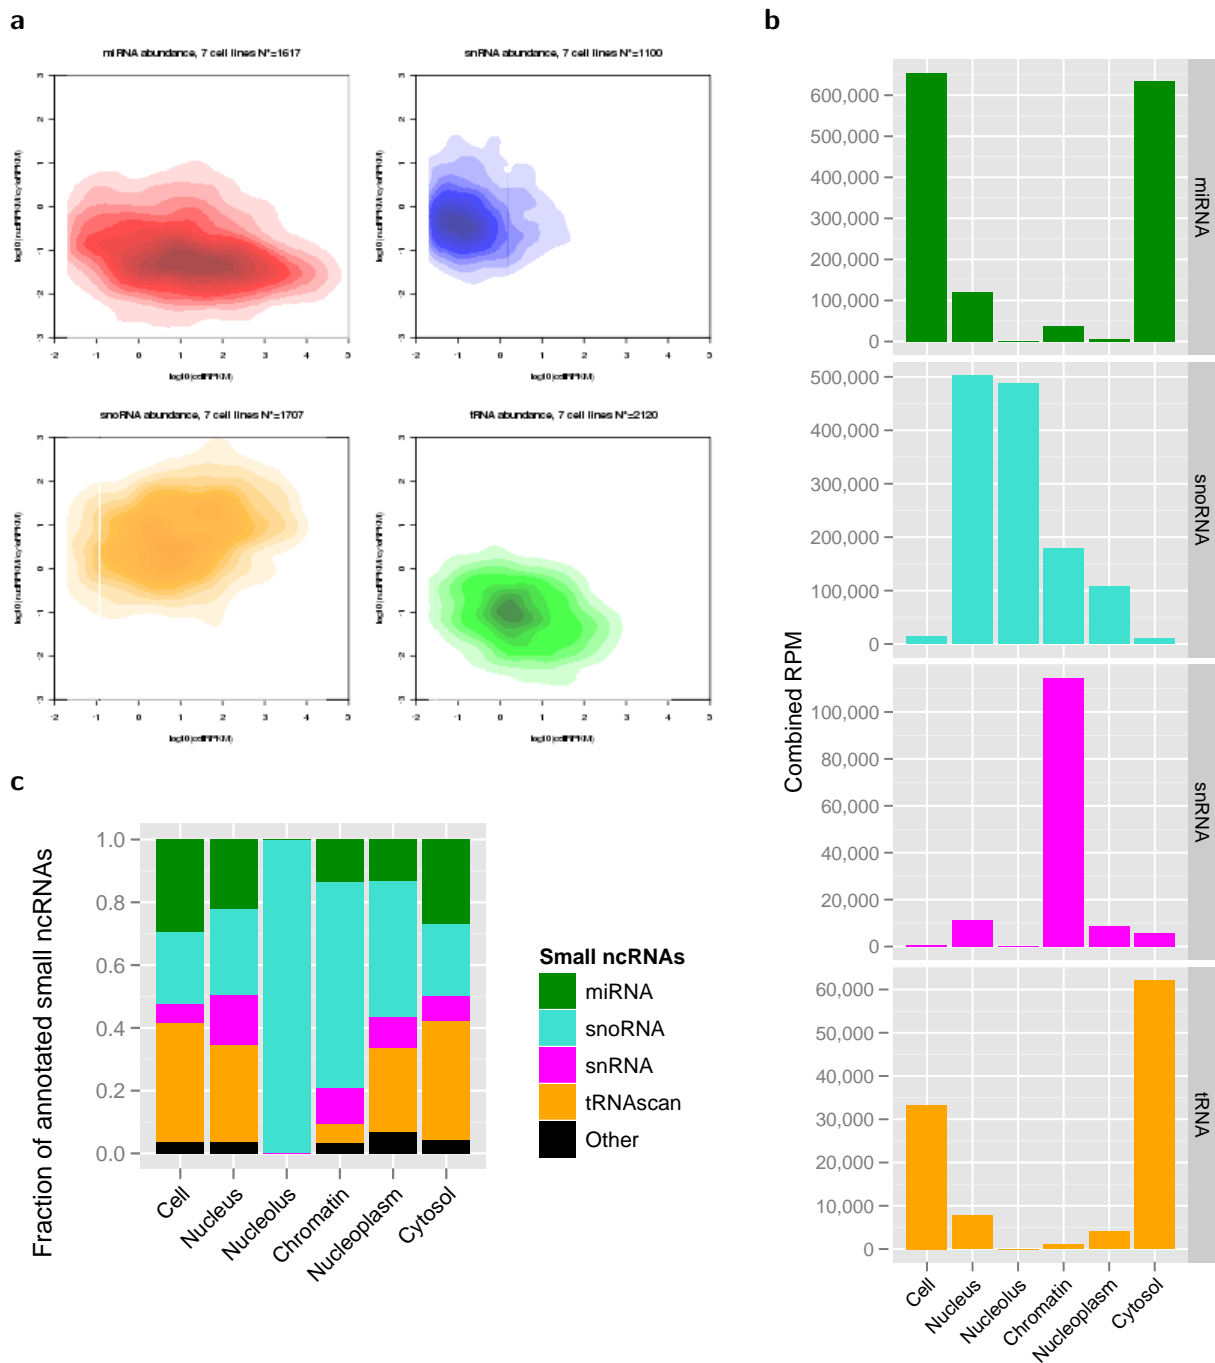

### Supplementary Figure S14

**Compartmentalization of annotated small RNAs.** Annotated small RNAs (miRNA, snoRNA, snRNA, tRNA) show sub-cellular localization patterns according to their functions. a. Nuclear/cytosolic enrichment versus whole cell expression. b. The abundance of each annotated small RNA class in a cell compartment is represented as the sum over all RPMs of individual transcripts. c. Shows the prevalence of a specific class within the repertoire of small RNAs detected in a sub-cellular compartment. a: all cell lines; b,c: only K562.

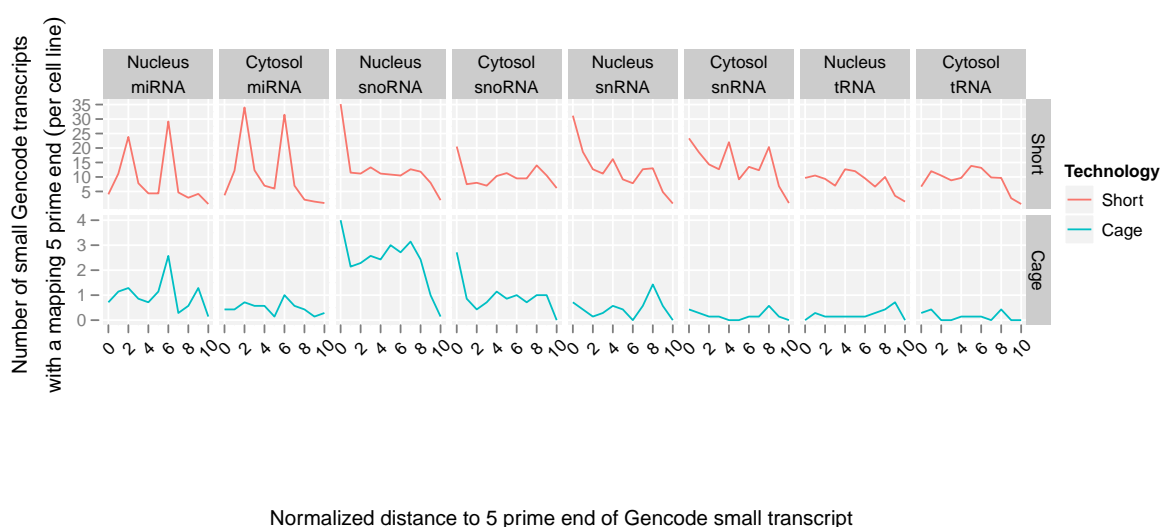

### Supplementary Figure S15

**Fragments of short RNA-seq and CAGE in annotated small RNAs.** Shown is the coverage of annotated small RNAs (miRNA, snoRNA, snRNA, tRNA) by short RNA-seq read / CAGE tag 5 prime ends in the nucleus and the cytosol. The coverage is calculated as the number of short RNA-seq reads / CAGE tags most 5 prime ends which fall at a given distance from the annotated small transcript 5 prime end (shown on the x-axis). The distance (i.e. transcript length) has been normalized using bins. The counts have been derived per individual cell line (see Supplementary section III for details).

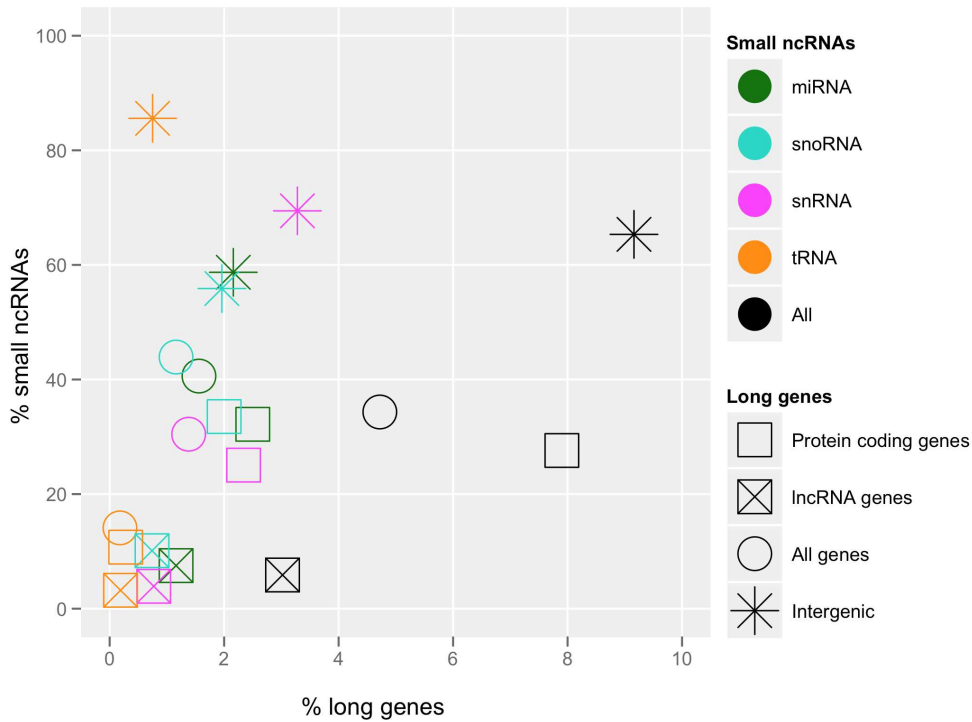

### Supplementary Figure S16

Proportion of annotated elements in different genomic domains that overlap different classes of small RNAs.

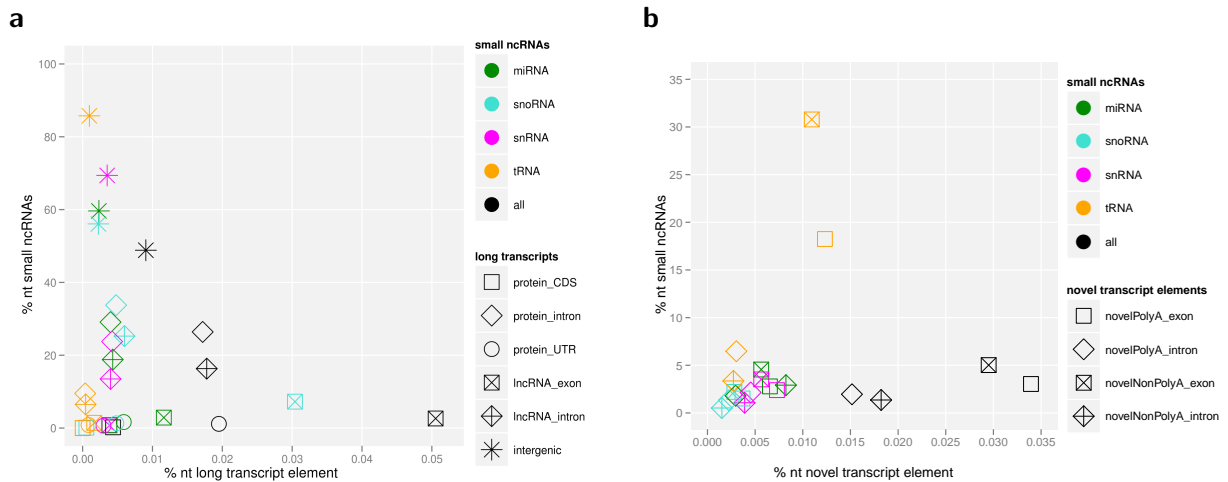

### Supplementary Figure S17

Nucleotide coverage of small RNAs over long RNAs. Gencode v7 annotated small ncRNAs (miRNA, snoRNA, snRNA, tRNA) in elements (CDS, introns, UTRs, exons and intergenic regions) of a. protein coding and long noncoding transcripts and b. novel intergenic / antisense transcript models.

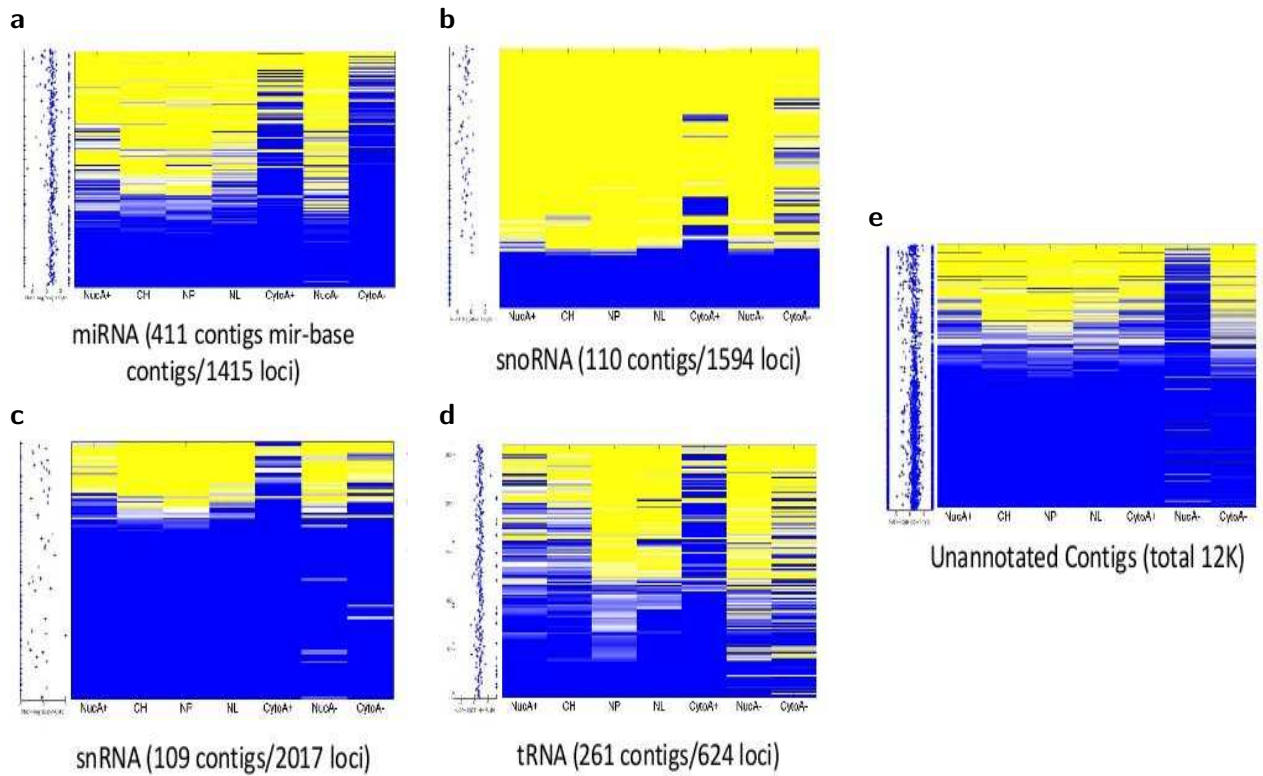

### Supplementary Figure S18

**Expression of long RNA contigs corresponding to detected short RNA.** The expression of the long RNA contigs which corresponding to detected short RNA are color-coded in the heatmaps. Blue indicates no expression yellow indicates high expression. The log-ratio of detected short RNA expression in cytoplasm over nucleus is shown in the scatter plot on the left side. Cytoplasm enriched short RNA contigs are distributed to the right side of zero while nucleus enriched short RNA contigs to the left. a. for detected miRNA contigs; b. for snoRNA; c. for snRNA; d. for tRNA and e. for total unannotated short RNA.



a

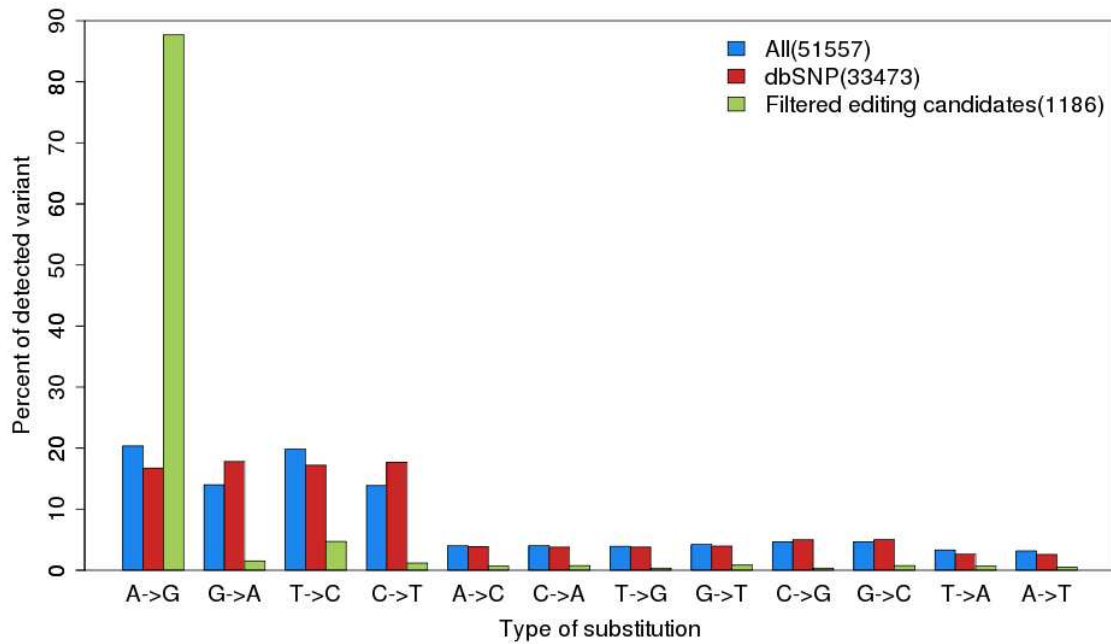

b

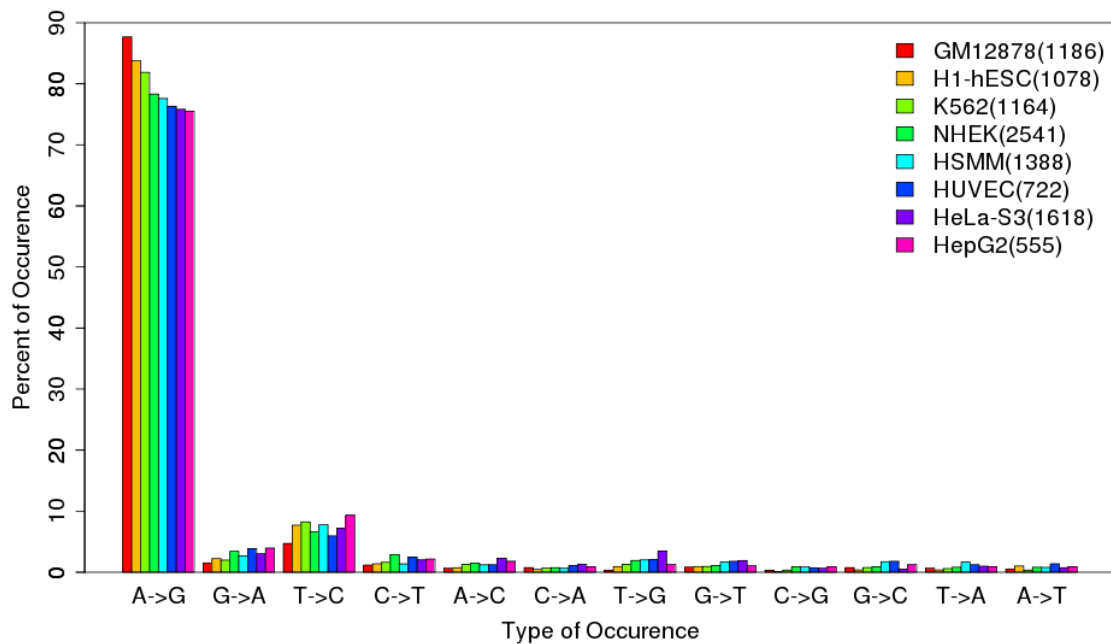

### Supplementary Figure S19

**Profile of RNA editing in ENCODE whole-cell datasets and compartments.** a. The profile of RNA-detected single nucleotide variants (SNV) in GM12878 that are detected independently in both the Caltech whole-cell polyA-selected non-stranded dataset and the CSHL stranded dataset, with 65% of the detected SNVs match entries in dbSNP 132, and showing a balanced distribution of A->G and G->A substitutions. More than 80% of the additional 7067 (13%) RNA SNVs that are not within 5bp of an intron boundary are A->G substitutions, with G->A corresponding to less than 4%. b. SNV substitution frequency in the same samples as B. While A->G SNVs are always the most prevalent RNA-based SNV, they represent less than 60% of the total in six of the 10 samples.

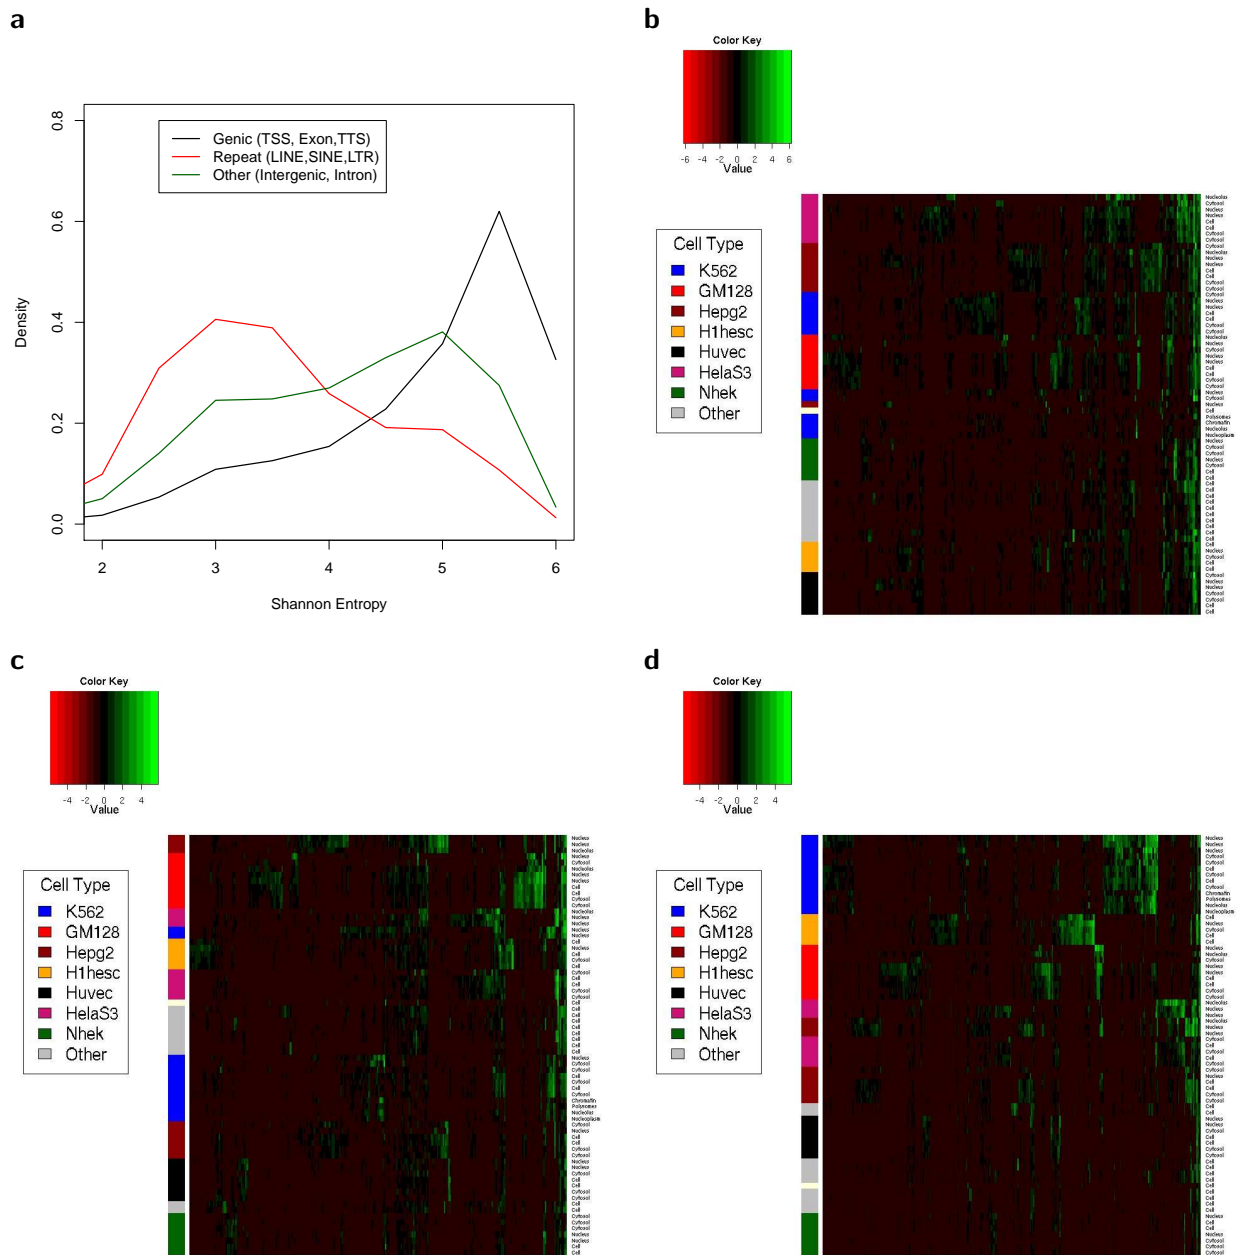

### Supplementary Figure S20

**Cell line specific expression of repeat elements.** a. Shannon Entropy of CAGE cluster expression profiles across all experiments separated by broad annotation categories. A low entropy means a narrow expression across experiments, thus intergenic LINE, SINE and LTR repeats are noticeably more narrowly expressed than other genomic categories. Heatmaps of b. LINE c. SINE and d. LTR repeat expression across cell lines and compartments. Each column represents an individual repeat copy expressed at least 1 tag per million in any experiment. Expressed repeats predominantly cluster with other repeats in the same cell line rather than across compartments.

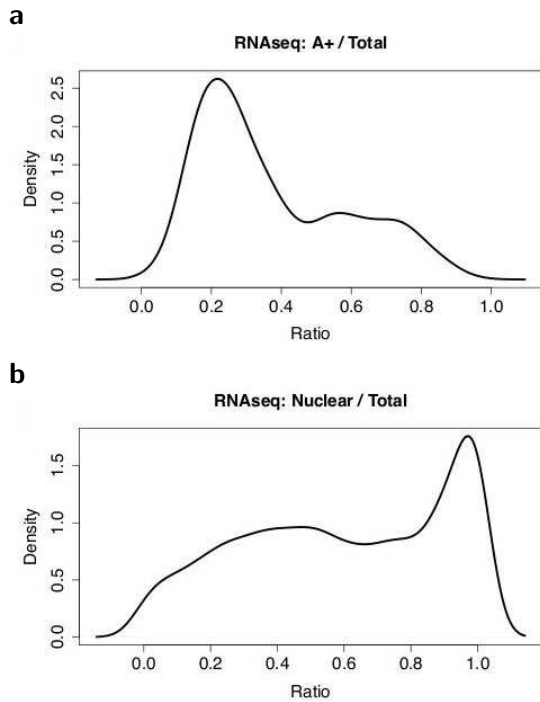

### Supplementary Figure S21

**Diverse features of transcription at predicted enhancer loci, and eRNA cell type specificity.** Density plots of the relative RNA-seq signal in the (a) polyA+ and (b) nuclear RNA fractions compared to total signal pooled from all fractions. The majority of transcripts at enhancers are depleted in the polyA+ fraction and enriched in the nuclear fraction, but considerable diversity exists in both dimensions.

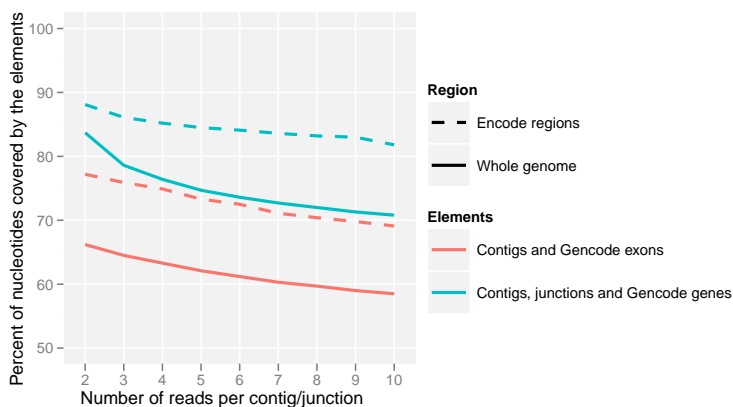

### Supplementary Figure S22

**Genome Coverage.** The percentage of whole genome and pilot ENCODE regions coverage by RNA-seq contigs and introns as a function of the number of supporting RNA-seq reads per element. All Gencode v7 exons and introns are also included in the coverage calculation. The genomic gaps (as annotated by UCSC) are excluded from the calculation.

## ENCODE cell lines

| Cell Lines  | Tier | Biology                                                                                             | Source            | Tissue              |
|-------------|------|-----------------------------------------------------------------------------------------------------|-------------------|---------------------|
| K562        | 1    | Pleural effusion of a 53-year-old female with chronic myelogenous leukemia in terminal blast crises | ATCC; CCL-243     | Blood               |
| GM12878     | 1    | Lymphoblastoid, International HapMap Project - CEPH/Utah - European Caucasian, Epstein-Barr Virus   | Coriell; GM12878  | Blood               |
| H1-hESC     | 1    | Embryonic stem cells                                                                                | Cellular Dynamics | embryonic stem cell |
| HepG2       | 2    | liver carcinoma                                                                                     | ATCC; HB-8065     | liver               |
| HUVEC       | 2    | umbilical vein endothelial cells                                                                    | Lonza; CC-2517    | endothelium         |
| Hela-S3     | 2    | cervical carcinoma                                                                                  | ATCC; CCL-2.2     | cervix              |
| A549        | 2    | epithelial cell line derived from a lung carcinoma tissue                                           | ATCC; CCL-185     | lung                |
| SK-N-SH(RA) | 2    | neuroblastoma cell line, treatment: differentiated with retinoic acid                               | ATCC; HTB-11      | brain               |
| AG04450     | 2    | fetal lung fibroblast                                                                               | Coriell; AG04450  | lung                |
| MCF7        | 2    | mammary gland, adenocarcinoma                                                                       | ATCC; HTB-22      | breast              |
| BJ          | 3    | The line was established from skin taken from normal foreskin                                       | ATCC; CCL-2522    | skin                |
| NHEK        | 3    | epidermal keratinocytes                                                                             | Lonza; CC-2501    | skin                |
| NHLF        | 3    | Normal Human Lung Fibroblasts                                                                       | Lonza; CC-2512    | lung                |
| HMEC        | 3    | Human Mammary Epithelial Cells                                                                      | Lonza; CC-2551    | breast              |
| HSMM        | 3    | Normal Human Skeletal Muscle Myoblasts                                                              | Lonza; CC-2580    | muscle              |

Additional Information : <http://genome.ucsc.edu/ENCODE/cellTypes.html>

## Supplementary Table S1

**ENCODE Cell Lines.** Cell lines profiled in this manuscript and by the ENCODE consortia. Tier 1 cell lines: K562, GM12878, H1-hESC. Tier 2: HepG2, HUVEC, Hela-S3, A549, SK-N-SH + Retinoic Acid, AG04450, MCF7. Tier 3 cell lines: BJ, NHEK, NHLF, HMEC, HSMM.

## RNA data and processing software

|               | Read length | Average depth (million reads) | Total depth (million reads) | Mapping software | Processing software                                                                |
|---------------|-------------|-------------------------------|-----------------------------|------------------|------------------------------------------------------------------------------------|
| Long RNA-seq  | 2 x 76      | 95                            | 16,000                      | STAR             | - Cufflinks (transcript modelling)<br>- Flux capacitor (transcript quantification) |
| Short RNA-seq | 1 x 36      | 29                            | 1,300                       | TopHat           | - Bedtools (transcript quantification)                                             |
| CAGE          | 1 x 27      | 22                            | 920                         | Delve            | - paraclu (cage clustering)<br>- HMM based classifier (real TSS vs other signal)   |
| RNA-PET       | 2 x 36      | 12                            | 47                          | TopHat           | - GIS pipeline (clustering, mapping to annotation and quantification)              |

## Supplementary Table S2

RNA data and processing software.

**a. Polyadenylated RNAs****1. Expression of Gencode (v7) annotated elements**

| Gene type          | Detected exons <sup>2</sup><br>(annotation #) | Detected splice junctions <sup>2</sup><br>(annotation #) | Detected transcripts <sup>2</sup><br>(annotation #) | Detected genes <sup>2</sup><br>(annotation #) | Exon nucleotide coverage <sup>3</sup> (%) | Number of genes expressed in at least one cell line | Number of genes expressed in only 1 cell line | Proportion over genes expressed (%) | Number of genes expressed in 14 cell lines | Proportion over genes expressed (%) |
|--------------------|-----------------------------------------------|----------------------------------------------------------|-----------------------------------------------------|-----------------------------------------------|-------------------------------------------|-----------------------------------------------------|-----------------------------------------------|-------------------------------------|--------------------------------------------|-------------------------------------|
| Long non coding    | 20,450<br>(41,467)                            | 7,917<br>(26,872)                                        | 6,205<br>(14,880)                                   | 5,668 (9,277)                                 | 85.5                                      | 5,668                                               | 1,390                                         | 24.5                                | 125                                        | 2.2                                 |
| Protein coding     | 284,081<br>(318,514)                          | 194,192<br>(244,158)                                     | 58,485<br>(76,006)                                  | 18,842<br>(20,679)                            | 97.9                                      | 18,842                                              | 1,129                                         | 6.0                                 | 10,366                                     | 55.0                                |
| Other <sup>1</sup> | 96,614<br>(133,937)                           | 19,026<br>(47,663)                                       | 43,334<br>(71,113)                                  | 9,312<br>(21,750)                             | 94.7                                      | 9,312                                               | 2,297                                         | 24.7                                | 2,104                                      | 22.6                                |
| Total annotated    | 401,145<br>(493,918)                          | 221,135<br>(318,693)                                     | 108,024<br>(161,999)                                | 33,822<br>(51,706)                            | 96.4                                      | 33,822                                              | 4,816                                         | 14.2                                | 12,595                                     | 37.2                                |

**2. Expression of Gencode (v7) intergenic and antisense elements**

| Category     | Detected exons <sup>2</sup> | Detected splice junctions <sup>2</sup> | Detected transcripts <sup>2</sup> | Detected genes <sup>2</sup> |
|--------------|-----------------------------|----------------------------------------|-----------------------------------|-----------------------------|
| Mono-exonic  | 18,932                      | NA                                     | 18,931                            | 17,387                      |
| Multi-exonic | 29,147                      | 54,899                                 | 13,357                            | 6,292                       |
| Total        | 48,079                      | 54,899                                 | 32,288                            | 23,679                      |

**b. Non-Polyadenylated RNAs****1. Expression of Gencode (v7) annotated elements**

| Gene type          | Detected exons <sup>2</sup><br>(annotation #) | Detected splice junctions <sup>2</sup><br>(annotation #) | Detected transcripts <sup>2</sup><br>(annotation #) | Detected genes <sup>2</sup><br>(annotation #) | Exon nucleotide coverage <sup>3</sup> (%) | Number of genes expressed in at least one cell line | Number of genes expressed in only 1 cell line | Proportion over genes expressed (%) | Number of genes expressed in 14 cell lines | Proportion over genes expressed (%) |
|--------------------|-----------------------------------------------|----------------------------------------------------------|-----------------------------------------------------|-----------------------------------------------|-------------------------------------------|-----------------------------------------------------|-----------------------------------------------|-------------------------------------|--------------------------------------------|-------------------------------------|
| Long non coding    | 15,653<br>(41,467)                            | 3,918<br>(26,872)                                        | 3,397<br>(14,880)                                   | 3,952 (9,277)                                 | 87.9                                      | 3,952                                               | 1,365                                         | 34.5                                | 125                                        | 3.2                                 |
| Protein coding     | 261,410<br>(318,514)                          | 168,039<br>(244,158)                                     | 42,652<br>(76,006)                                  | 17,297<br>(20,679)                            | 97                                        | 17,297                                              | 1,577                                         | 9.1                                 | 6,950                                      | 40.2                                |
| Other <sup>1</sup> | 85,590<br>(133,937)                           | 9,731<br>(47,663)                                        | 31,672<br>(71,113)                                  | 7,398<br>(21,750)                             | 95                                        | 7,398                                               | 2,085                                         | 28.2                                | 724                                        | 9.8                                 |
| Total annotated    | 362,653<br>(493,918)                          | 181,688<br>(318,693)                                     | 77,721<br>(161,999)                                 | 28,647<br>(51,706)                            | 96.1                                      | 28,647                                              | 5,027                                         | 17.5                                | 7,799                                      | 27.2                                |

**2. Expression of Gencode (v7) intergenic and antisense elements**

| Category     | Detected exons <sup>2</sup> | Detected splice junctions <sup>2</sup> | Detected transcripts <sup>2</sup> | Detected genes <sup>2</sup> |
|--------------|-----------------------------|----------------------------------------|-----------------------------------|-----------------------------|
| Mono-exonic  | 47,503                      | NA                                     | 47,503                            | 45,409                      |
| Multi-exonic | 10,674                      | 27,178                                 | 4,791                             | 3,290                       |
| Total        | 58,177                      | 27,178                                 | 52,294                            | 48,699                      |

<sup>1</sup> includes pseudogenes, miRNAs, etc<sup>2</sup> all elements that passed npIDR (0.1)<sup>3</sup> cumulative detected nucleotide in detected exons / total nucleotides in detected exons**Supplementary Table S3****a. Polyadenylated and b. non-polyadenylated RNAs.**

## Number of identifications from proteogenomic mapping.

| Number of peptides<br>(# of peptides in the novel exons) | Number of spectra<br>(# of spectra mapped to the novel exons) | Number of novel models with least one spectral hit<br>(# of novel models with at least one spectral hit in their novel exons) | Number of novel models with 2 or more spectral hits in their novel exons<br>(# of antisense/intergenic models with 2 or more spectral hits in their novel exons) | Number of novel models with 5 or more spectral hits and/or 2 or more peptide hits in their novel exons<br>(# of antisense/intergenic models with 5 or more spectral hits and/or 2 or peptide hits in their novel exons) |
|----------------------------------------------------------|---------------------------------------------------------------|-------------------------------------------------------------------------------------------------------------------------------|------------------------------------------------------------------------------------------------------------------------------------------------------------------|-------------------------------------------------------------------------------------------------------------------------------------------------------------------------------------------------------------------------|
| 18,289<br>(3,076)                                        | 74,310<br>(4,104)                                             | 42,067<br>(9,059)                                                                                                             | 1,072<br>(145)                                                                                                                                                   | 419<br>(56)                                                                                                                                                                                                             |

### Supplementary Table S4

**Number of peptide identifications from proteogenomic mapping.** This table shows the number of total peptide identifications as well as the number of peptide identifications in novel exons only (noted in parenthesis). The results presented here are at 1% FDR. A total of 998,570 MS/MS spectra and 263,171 novel transcript sequences were used for this search.

**K562 nuclear sub-compartments (total RNA)****1. Expression of Gencode (v7) annotated elements**

| Gene type          | Detected exons <sup>2</sup><br>(annotation #) | Detected splice<br>junctions <sup>2</sup><br>(annotation #) | Detected<br>transcripts <sup>2</sup><br>(annotation #) | Detected genes <sup>2</sup><br>(annotation #) | Exon nucleotide<br>coverage <sup>3</sup> (%) |
|--------------------|-----------------------------------------------|-------------------------------------------------------------|--------------------------------------------------------|-----------------------------------------------|----------------------------------------------|
| Long non<br>coding | 8,109 (41,467)                                | 1,644 (26,872)                                              | 1,903 (14,880)                                         | 2,032 (9,277)                                 | 79                                           |
| Protein coding     | 167,711 (318,514)                             | 109,253 (244,158)                                           | 21,661 (76,006)                                        | 12,344 (20,679)                               | 96.3                                         |
| Other <sup>1</sup> | 53,877 (133,937)                              | 5,260 (47,663)                                              | 18,630 (71,113)                                        | 3,954 (21,750)                                | 93.1                                         |
| Total annotated    | 229,697 (493,918)                             | 116,157 (318,693)                                           | 42,194 (161,999)                                       | 18,330 (51,706)                               | 94.7                                         |

<sup>1</sup> includes pseudogenes, miRNAs, etc<sup>2</sup> all elements that passed npIDR (0.1)<sup>3</sup> cumulative detected nucleotide in detected exons / total nucleotides in detected exons**2. Expression of Gencode (v7) intergenic and antisense elements**

| Category     | Detected exons <sup>4</sup> | Detected splice<br>junctions <sup>4</sup> | Detected<br>transcripts <sup>4</sup> | Detected genes <sup>4</sup> |
|--------------|-----------------------------|-------------------------------------------|--------------------------------------|-----------------------------|
| Mono-exonic  | 40,319                      | NA                                        | 40,273                               | 39,327                      |
| Multi-exonic | 6,014                       | 14,374                                    | 2,570                                | 1,791                       |
| Total        | 46,333                      | 14,374                                    | 42,843                               | 41,118                      |

<sup>4</sup> all elements that passed npIDR (0.1)**Supplementary Table S5  
K562 nuclear subcompartments (total RNA).**

**K562 nuclear sub-compartment specific elements****1. Gencode (v7) annotated genes**

| Cell compartment | Detected exons |                            |     | Detected splice junctions |                            |     | Detected transcripts |                            |     | Detected genes |                            |     |
|------------------|----------------|----------------------------|-----|---------------------------|----------------------------|-----|----------------------|----------------------------|-----|----------------|----------------------------|-----|
|                  | All            | Unique to cell compartment |     | All                       | Unique to cell compartment |     | All                  | Unique to cell compartment |     | All            | Unique to cell compartment |     |
|                  |                | #                          | %   |                           | #                          | %   |                      | #                          | %   |                | #                          | %   |
| Nucleolus        | 170,484        | 3,177                      | 1.9 | 101,665                   | 135                        | 0.1 | 27,754               | 1,387                      | 5.0 | 12,940         | 826                        | 6.4 |
| Chromatin        | 189,818        | 1,093                      | 0.6 | 110,578                   | 422                        | 0.4 | 28,047               | 333                        | 1.2 | 16,604         | 145                        | 0.9 |
| Nucleoplasm      | 211,020        | 4,956                      | 2.3 | 99,765                    | 34                         | 0.0 | 32,764               | 694                        | 2.1 | 15,935         | 96                         | 0.6 |

**2. Gencode (v7) intergenic and antisense regions**

| Cell compartment | Detected exons |                            |     | Detected splice junctions |                            |      | Detected transcripts |                            |     | Detected genes |                            |     |
|------------------|----------------|----------------------------|-----|---------------------------|----------------------------|------|----------------------|----------------------------|-----|----------------|----------------------------|-----|
|                  | All            | Unique to cell compartment |     | All                       | Unique to cell compartment |      | All                  | Unique to cell compartment |     | All            | Unique to cell compartment |     |
|                  |                | #                          | %   |                           | #                          | %    |                      | #                          | %   |                | #                          | %   |
| Nucleolus        | 43,024         | 48                         | 0.1 | 5,569                     | 847                        | 15.2 | 3,562                | 8                          | 0.2 | 38,326         | 42                         | 0.1 |
| Chromatin        | 45,587         | 140                        | 0.3 | 7,136                     | 1,299                      | 18.2 | 42,346               | 398                        | 0.9 | 40,729         | 133                        | 0.3 |
| Nucleoplasm      | 45,549         | 148                        | 0.3 | 11,020                    | 2,248                      | 20.4 | 42,389               | 441                        | 1.0 | 40,827         | 141                        | 0.3 |

**Supplementary Table S6**

**Elements specific to K562 nuclear subcompartments.** This table shows the total and unique number of elements (exons, splice junctions, transcripts and genes) detected in the K562 nuclear subcompartments. (1) Annotated elements and (2) Novel intergenic / antisense elements.



### Cell line specific Gencode genes

| Cell line  | Number of protein coding genes expressed in this cell line only (polyA+, whole cell) |
|------------|--------------------------------------------------------------------------------------|
| A549       | 36                                                                                   |
| AG04450    | 6                                                                                    |
| BJ         | 13                                                                                   |
| GM12878    | 199                                                                                  |
| H1-hESC    | 308                                                                                  |
| HSMM       | 74                                                                                   |
| HUVEC      | 19                                                                                   |
| HeLa-S3    | 31                                                                                   |
| HepG2      | 131                                                                                  |
| K562       | 116                                                                                  |
| MCF-7      | 74                                                                                   |
| NHEK       | 95                                                                                   |
| NHLF       | 17                                                                                   |
| SK-N-SH_RA | 109                                                                                  |

#### Supplementary Table S7

**Cell line specific Gencode genes.** Annotated protein coding genes expressed in the different cell lines.

### Reliable poly A+ transcriptional start sites identified by CAGE

| Cell line and compartment | All peaks <sup>1</sup> | IDR peaks <sup>2</sup> | Specific IDR peaks <sup>3</sup> | Gencode <sup>4</sup> | Intergenic / antisense <sup>5</sup> | Remaining <sup>6</sup> |
|---------------------------|------------------------|------------------------|---------------------------------|----------------------|-------------------------------------|------------------------|
| A549 cell                 | 26,424                 | 13,491                 | 189                             | 9,028                | 59                                  | 4,404                  |
| AG04450 cell              | 34,239                 | 17,490                 | 381                             | 10,478               | 49                                  | 6,963                  |
| BJ cell                   | 28,836                 | 14,688                 | 208                             | 9,631                | 40                                  | 5,017                  |
| GM12878 cell              | 74,953                 | 28,959                 | 759                             | 11,599               | 261                                 | 17,099                 |
| GM12878 cytosol           | 69,362                 | 26,284                 | 433                             | 11,457               | 237                                 | 14,590                 |
| GM12878 nucleus           | 81,970                 | 29,734                 | 2,054                           | 11,713               | 320                                 | 17,701                 |
| H1-hESC cell              | 77,647                 | 30,816                 | 3,153                           | 13,177               | 260                                 | 17,379                 |
| HeLa-S3 cell              | 67,744                 | 25,548                 | 490                             | 11,464               | 230                                 | 13,854                 |
| HeLa-S3 cytosol           | 62,124                 | 23,132                 | 273                             | 11,124               | 164                                 | 11,844                 |
| HeLa-S3 nucleus           | 67,200                 | 22,335                 | 629                             | 10,817               | 263                                 | 11,255                 |
| HepG2 cell                | 82,750                 | 34,680                 | 2,544                           | 12,126               | 212                                 | 22,342                 |
| HepG2 cytosol             | 65,787                 | 25,035                 | 338                             | 11,150               | 148                                 | 13,737                 |
| HepG2 nucleus             | 83,374                 | 31,504                 | 2,514                           | 11,908               | 270                                 | 19,326                 |
| HUVEC cell                | 77,539                 | 32,281                 | 1,100                           | 12,687               | 138                                 | 19,456                 |
| HUVEC cytosol             | 76,698                 | 29,621                 | 1,136                           | 11,752               | 92                                  | 17,777                 |
| HUVEC nucleus             | 88,856                 | 30,296                 | 2,329                           | 11,849               | 107                                 | 18,340                 |
| K562 cell                 | 64,222                 | 24,493                 | 390                             | 10,908               | 256                                 | 13,329                 |
| K562 cytosol              | 63,788                 | 24,844                 | 400                             | 11,197               | 241                                 | 13,406                 |
| K562 nucleus              | 81,103                 | 30,451                 | 2,942                           | 11,480               | 316                                 | 18,655                 |
| MCF7 cell                 | 46,511                 | 16,266                 | 529                             | 10,173               | 88                                  | 6,005                  |
| NHEK cell                 | 60,786                 | 26,333                 | 1,178                           | 11,978               | 97                                  | 14,258                 |
| NHEK cytosol              | 52,819                 | 18,608                 | 180                             | 10,304               | 44                                  | 8,260                  |
| NHEK nucleus              | 68,223                 | 0                      | 0                               | 0                    | 0                                   | 0                      |
| SK-N-SH_RA cell           | 31,726                 | 16,741                 | 511                             | 10,474               | 125                                 | 6,142                  |

<sup>1</sup> Total number of CAGE peaks

<sup>2</sup> Number of CAGE peaks with an IDR value lower than 0.1

<sup>3</sup> Number of IDR peaks found in this experiment but not in any other (based on stranded overlap)

<sup>4</sup> Number of IDR peaks overlapping the TSS of a polyA+ detected Gencode transcript (extended by 50 bp on each side)

<sup>5</sup> Number of IDR peaks overlapping the TSS of a polyA+ intergenic/antisense transcript (extended by 50 bp on each side)

### Supplementary Table S8

**Reliable polyA+ Transcriptional Start Sites identified by CAGE.** This table shows the number of CAGE peaks (clusters), raw and filtered for reproducibility, in different genomic regions.

**Allele specific expression of genes**

| RNA-Seq Datasets            | Genes showing ASE                | Genes assessable for ASE                | Percentage of genes showing ASE                |
|-----------------------------|----------------------------------|-----------------------------------------|------------------------------------------------|
| Whole-Cell Long PolyA+      | 168                              | 1,158                                   | 0.15                                           |
| Cytoplasm Long PolyA+       | 139                              | 782                                     | 0.18                                           |
| Nucleus Long PolyA+         | 240                              | 1,697                                   | 0.14                                           |
| Pooled Long PolyA+          | 375                              | 2,153                                   | 0.17                                           |
| Pooled Long PolyA+ & PolyA- | 591                              | 2,952                                   | 0.2                                            |
| RNA-Seq Datasets            | Long non-coding RNAs showing ASE | Long non-coding RNAs assessable for ASE | Percentage of long non-coding RNAs showing ASE |
| Whole-Cell Long PolyA-      | 75                               | 441                                     | 0.17                                           |
| Cytoplasm Long PolyA-       | 2                                | 16                                      | 0.13                                           |
| Nucleus Long PolyA-         | 30                               | 437                                     | 0.07                                           |
| Pooled Long PolyA-          | 80                               | 623                                     | 0.13                                           |
| Pooled Long PolyA+ & PolyA- | 147                              | 816                                     | 0.18                                           |

**Supplementary Table S9**

**Allele specific expression of genes.** Counts of Gencode v7 coding genes and long non-coding RNAs that exhibit allele-specific expression (ASE) for the various RNA-seq data sets for different cellular fractions as well as pooled datasets. This was done using the AlleleSeq pipeline. For each RNA-seq dataset analyzed we display in the third column the counts of genes or long non-coding RNAs that are expressed at sufficient sequencing depth in order to assess allele-specific behavior and contain a heterozygous SNP. The last column shows the percentage of assessable genes that exhibit allele-specific behavior.

## Genome coverage

| Read per junction/contig             | whole genome, scaled to exclude gaps |      |      |      |      |      |      |      |      |  |
|--------------------------------------|--------------------------------------|------|------|------|------|------|------|------|------|--|
|                                      | 2                                    | 3    | 4    | 5    | 6    | 7    | 8    | 9    | 10   |  |
| contigs                              | 66.0                                 | 64.2 | 63.0 | 61.8 | 60.9 | 60.0 | 59.3 | 58.7 | 58.1 |  |
| introns                              | 73.8                                 | 62.8 | 57.4 | 53.9 | 51.2 | 49.2 | 47.6 | 46.2 | 44.9 |  |
| intersection introns+contigs         | 58.8                                 | 52.7 | 49.1 | 46.6 | 44.6 | 43.1 | 41.8 | 40.8 | 39.8 |  |
| union introns+contigs                | 80.9                                 | 74.4 | 71.3 | 69.1 | 67.5 | 66.1 | 65.1 | 64.1 | 63.2 |  |
| <b>contigs + Gencode exons</b>       | 66.2                                 | 64.5 | 63.3 | 62.1 | 61.2 | 60.3 | 59.7 | 59.0 | 58.5 |  |
| <b>contigs+introns+Gencode genes</b> | 83.7                                 | 78.6 | 76.4 | 74.7 | 73.6 | 72.7 | 72.0 | 71.3 | 70.8 |  |
| Read per junction/contig             | encode regions                       |      |      |      |      |      |      |      |      |  |
|                                      | 2                                    | 3    | 4    | 5    | 6    | 7    | 8    | 9    | 10   |  |
| contigs                              | 77.0                                 | 75.7 | 74.7 | 73.2 | 72.3 | 71.0 | 70.2 | 69.6 | 68.8 |  |
| introns                              | 79.3                                 | 74.0 | 70.7 | 68.6 | 67.4 | 59.8 | 59.2 | 58.6 | 54.2 |  |
| intersection introns+contigs         | 70.2                                 | 66.8 | 63.4 | 61.2 | 59.9 | 53.1 | 52.6 | 52.0 | 49.3 |  |
| union introns+contigs                | 86.0                                 | 82.9 | 81.9 | 80.6 | 79.7 | 77.7 | 76.8 | 76.2 | 73.7 |  |
| <b>contigs + Gencode exons</b>       | 77.2                                 | 75.9 | 74.9 | 73.3 | 72.5 | 71.1 | 70.4 | 69.8 | 69.1 |  |
| <b>contigs+introns+Gencode genes</b> | 88.1                                 | 86.1 | 85.2 | 84.5 | 84.1 | 83.6 | 83.2 | 83.0 | 81.8 |  |

## Supplementary Table S10

Genome Coverage. Companion data for figure S23.
